# Supplementary material
Source: PubMed Central journal article supplement (PMC7080090)
Supplement: 253_2016_7491_MOESM1_ESM.pdf [file 253_2016_7491_MOESM1_ESM.pdf]

# Applied Microbiology and Biotechnology

## Reverse Transcription Strand Invasion Based Amplification (RT-SIBA): A Method for Rapid Detection of Influenza A and B

### Supplementary data

Kevin Eboigbodin<sup>1,#</sup>, Sanna Filén<sup>1\*</sup>, Tuomas Ojalehto<sup>1\*</sup>, Mirko Brummer<sup>1</sup>, Sonja Elf<sup>1</sup>,  
Kirsi Pousi<sup>1</sup>, and Mark Hoser<sup>2</sup>

<sup>1</sup>Research and Development, Orion Diagnostica, Oy, P. O. BOX 83, FI-02101  
Espoo, Finland

<sup>2</sup> Molecular Biology, GeneForm Technologies, Broadstairs, United Kingdom

\*Authors with equal contribution

#corresponding author

To whom correspondence should be addressed: Kevin E. Eboigbodin, Research and  
Development, Orion Diagnostica Oy, P.O.Box 83, FI-02101, Espoo, Finland,

Tel:+358509665879, E-mail: [kevin.eboigbodin@oriondiagnostica.fi](mailto:kevin.eboigbodin@oriondiagnostica.fi)

Table S1 – Invasion oligonucleotides (IO) used for optimisation of SIBA influenza A assay

| SIBA Influenza A IO | Sequence                                                                  |
|---------------------|---------------------------------------------------------------------------|
| 0                   | CCGAATTCTTTTGGTCGCTGTCTGGCTGTCAmGmUmAmAmGmUmAmUmGmC                       |
| poly 2C             | <b>CC</b> CCGAATTCTTTTGGTCGCTGTCTGGCTGTCAmGmUmAmAmGmUmAmUmGmC             |
| poly 6C             | <b>CCCCCC</b> CCGAATTCTTTTGGTCGCTGTCTGGCTGTCAmGmUmAmAmGmUmAmUmGmC         |
| poly 10C*           | <b>CCCCCCCCCC</b> CCGAATTCTTTTGGTCGCTGTCTGGCTGTCAmGmUmAmAmGmUmAmUmGmC     |
| poly 14C            | <b>CCCCCCCCCCCCCC</b> CCGAATTCTTTTGGTCGCTGTCTGGCTGTCAmGmUmAmAmGmUmAmUmGmC |
| poly 17C            | <b>CCCCCCCCCCCCCC</b> CCGAATTCTTTTGGTCGCTGTCTGGCTGTCAmGmUmAmAmGmUmA       |
| polyT               | <b>TTTTTTTTTTT</b> CCGAATTCTTTTGGTCGCTGTCTGGCTGTCAmGmUmAmAmGmUmAmUmGmC    |
| polyA               | <b>AAAAAAAAA</b> CCGAATTCTTTTGGTCGCTGTCTGGCTGTCAmGmUmAmAmGmUmAmUmGmC      |
| polyG               | <b>GGGGGGGGG</b> CCGAATTCTTTTGGTCGCTGTCTGGCTGTCAmGmUmAmAmGmUmAmUmGmC      |
| pyrimidine          | <b>TCTCTCTC</b> CCGAATTCTTTTGGTCGCTGTCTGGCTGTCAmGmUmAmAmGmUmAmUmGmC       |
| purine              | <b>AGAGAGAGAG</b> CCGAATTCTTTTGGTCGCTGTCTGGCTGTCAmGmUmAmAmGmUmAmUmGmC     |
| mixed               | <b>CTAGATCTGA</b> CCGAATTCTTTTGGTCGCTGTCTGGCTGTCAmGmUmAmAmGmUmAmUmGmC     |

In invasion oligonucleotides bold sequences denote non-homologous seeding area sequence. *mA*, *mC*, *mG* and *mU* denote 2'-O-methyl RNA nucleotides. \*poly 10C was used for subsequent SIBA influenza A experiments
